# Supplementary material for: External validation in a Chinese cohort of a nomogram developed using MIMIC-IV for predicting sepsis-associated delirium in elderly ICU patients
Source: Research Square preprint supplement (doi:10.21203/rs.3.rs-7380480/v1), 2025-10-15
Supplement: Supplementary file 1 [file 702dff12ad9ad7d0d8d7f5c4.docx]

**Supplementary Material**

**Table S1.** Detailed information on missing data of variables in the study

**Table S2.** Analysis of differences between groups in the training set.

**Table S2.** Analysis of differences between groups in the internal validation set.

**Table S4.** Analysis of differences between groups in the external validation set.

**Table S5.** Multivariate Logistic Regression Analysis of Predictors for Sepsis-Associated Delirium (SAD).

**Table S6.** The results of Hosmer–Lemeshow test.

**Table S1：**Detailed information on missing data of variables in the study

| Variable | MIMIC-IV  Data (4,753) | N missing | Missing rate | External validation set (281) | N missing | Missing rate |
| --- | --- | --- | --- | --- | --- | --- |
| Weight | 4735 | 18 | 0.37% | 281 | / | / |
| SOFA score | 4720 | 33 | 0.69% | 260 | 21 | 7.47% |
| Temperature | 4743 | 10 | 0.21% | 281 | / | / |
| Respiratory rate | 4744 | 9 | 0.19% | 281 | / | / |
| MBP | 4744 | 9 | 0.19% | 281 | / | / |
| PLT | 4676 | 77 | 1.62% | 281 | / | / |
| Hemoglobin | 4724 | 29 | 0.61% | 281 | / | / |
| WBC | 4740 | 13 | 0.27% | 281 | / | / |
| BUN | 4740 | 13 | 0.27% | 281 | / | / |
| Creatinine | 4720 | 33 | 0.69% | 276 | 5 | 1.81% |
| PH | 4737 | 16 | 0.34% | 281 | / | / |
| Potassium | 4740 | 13 | 0.27% | 281 | / | / |
| Lactate | 4707 | 46 | 0.97% | 244 | 37 | 15.16% |
| RDW | 3770 | 983 | 20.70% | / | / | / |
| Hematocrit | 3214 | 1539 | 32.38% | / | / | / |

The other variables in this study do not missing.

**Table S2.** Analysis of differences between groups in the training set.

| Variables | Total (n = 2852) | NO-SAD  (n = 1514) | SAD  (n = 1338) | Statistic | P |
| --- | --- | --- | --- | --- | --- |
|
| Demographic variables |  |  |  |  |  |
| Age, M (Q₁, Q₃) | 77.00 (71.00, 83.00) | 77.00 (71.00, 83.00) | 77.00 (71.00, 83.00) | Z=-0.58 | 0.561 |
| Gender, n (%) |  |  |  | χ²=0.04 | 0.837 |
| Female | 1289 (45.20) | 687 (45.38) | 602 (44.99) |  |  |
| Male | 1563 (54.80) | 827 (54.62) | 736 (55.01) |  |  |
| Weight, M (Q₁, Q₃) | 79.00 (65.00, 92.00) | 78.00 (65.00, 90.00) | 80.00 (65.00, 93.00) | Z=-1.75 | 0.079 |
| Admission Type, n (%) |  |  |  | χ²=6.40 | 0.011 |
| Non-Emergency | 885 (31.03) | 501 (33.09) | 384 (28.70) |  |  |
| Emergency | 1967 (68.97) | 1013 (66.91) | 954 (71.30) |  |  |
| Vital signs |  |  |  |  |  |
| Temperature Mean, M (Q₁, Q₃) | 36.90 (36.60, 37.20) | 36.80 (36.60, 37.00) | 37.00 (36.70, 37.50) | Z=-11.98 | <.001 |
| Heart Rate Mean, M (Q₁, Q₃) | 84.00 (74.00, 95.00) | 83.00 (74.00, 93.00) | 84.00 (74.00, 96.00) | Z=-1.92 | 0.055 |
| Respiratory Rate Mean, M (Q₁, Q₃) | 19.00 (17.00, 22.00) | 19.00 (17.00, 22.00) | 19.00 (17.00, 22.00) | Z=-2.50 | 0.013 |
| SBP Mean, M (Q₁, Q₃) | 113.00 (105.00, 125.00) | 113.00 (105.00, 125.00) | 113.00 (105.00, 124.00) | Z=-1.60 | 0.109 |
| DBP Mean, M (Q₁, Q₃) | 58.00 (53.00, 65.00) | 59.00 (53.00, 65.00) | 58.00 (53.00, 65.00) | Z=-1.14 | 0.254 |
| MBP Mean, M (Q₁, Q₃) | 74.00 (69.00, 81.00) | 74.00 (69.00, 81.00) | 74.00 (68.00, 81.00) | Z=-0.91 | 0.361 |
| pO2 Max, M (Q₁, Q₃) | 152.50 (82.00, 311.25) | 140.00 (78.00, 320.00) | 161.00 (87.00, 307.75) | Z=-1.89 | 0.058 |
| pCO2 Max, M (Q₁, Q₃) | 45.00 (40.00, 53.00) | 45.00 (39.00, 52.00) | 46.00 (40.00, 54.00) | Z=-3.29 | <.001 |
| Comorbidity variables |  |  |  |  |  |
| Hypertension, n (%) |  |  |  | χ²=0.74 | 0.389 |
| No | 1956 (68.58) | 1049 (69.29) | 907 (67.79) |  |  |
| Yes | 896 (31.42) | 465 (30.71) | 431 (32.21) |  |  |
| Diabetes, n (%) |  |  |  | χ²=4.18 | 0.041 |
| No | 2332 (81.77) | 1259 (83.16) | 1073 (80.19) |  |  |
| Yes | 520 (18.23) | 255 (16.84) | 265 (19.81) |  |  |
| Cancer, n (%) |  |  |  | χ²=9.58 | 0.002 |
| No | 2242 (78.61) | 1224 (80.85) | 1018 (76.08) |  |  |
| Yes | 610 (21.39) | 290 (19.15) | 320 (23.92) |  |  |
| Respiratory Failure, n (%) |  |  |  | χ²=12.56 | <.001 |
| No | 2254 (79.03) | 1235 (81.57) | 1019 (76.16) |  |  |
| Yes | 598 (20.97) | 279 (18.43) | 319 (23.84) |  |  |
| Renal Failure, n (%) |  |  |  | χ²=3.81 | 0.051 |
| No | 2089 (73.25) | 1132 (74.77) | 957 (71.52) |  |  |
| Yes | 763 (26.75) | 382 (25.23) | 381 (28.48) |  |  |
| Neurological Disease, n (%) |  |  |  | χ²=48.39 | <.001 |
| No | 2174 (76.23) | 1233 (81.44) | 941 (70.33) |  |  |
| Yes | 678 (23.77) | 281 (18.56) | 397 (29.67) |  |  |
| SOFA score, M (Q₁, Q₃) | 5.00 (4.00, 8.00) | 5.00 (3.00, 7.00) | 6.00 (4.00, 9.00) | Z=-8.18 | <.001 |
| Biochemistry variables |  |  |  |  |  |
| Hemoglobin Min, M (Q₁, Q₃) | 9.10 (7.90, 10.70) | 9.40 (8.10, 11.10) | 8.70 (7.50, 10.20) | Z=-8.28 | <.001 |
| Platelets Max, M (Q₁, Q₃) | 212.00 (153.00, 285.00) | 208.50 (151.00, 283.00) | 215.00 (154.25, 289.00) | Z=-1.05 | 0.295 |
| WBC Max, M (Q₁, Q₃) | 13.40 (9.50, 18.50) | 13.00 (9.40, 18.38) | 13.80 (9.70, 18.60) | Z=-2.21 | 0.027 |
| BUN Min, M (Q₁, Q₃) | 23.00 (16.00, 38.00) | 23.00 (15.00, 36.00) | 24.00 (16.00, 40.00) | Z=-3.23 | 0.001 |
| Calcium Min, M (Q₁, Q₃) | 8.10 (7.60, 8.60) | 8.10 (7.70, 8.60) | 8.00 (7.50, 8.60) | Z=-3.95 | <.001 |
| Creatinine Min, M (Q₁, Q₃) | 1.10 (0.80, 1.60) | 1.00 (0.80, 1.50) | 1.10 (0.80, 1.70) | Z=-3.29 | <.001 |
| Sodium Max, M (Q₁, Q₃) | 141.00 (138.00, 144.00) | 140.00 (137.00, 142.00) | 143.00 (139.00, 147.00) | Z=-15.63 | <.001 |
| Potassium Min, M (Q₁, Q₃) | 3.90 (3.60, 4.30) | 4.00 (3.60, 4.30) | 3.90 (3.50, 4.30) | Z=-2.32 | 0.020 |
| INR Min, M (Q₁, Q₃) | 1.20 (1.10, 1.40) | 1.20 (1.10, 1.40) | 1.20 (1.10, 1.40) | Z=-0.35 | 0.729 |
| PT Min, M (Q₁, Q₃) | 13.60 (12.20, 15.60) | 13.60 (12.20, 15.50) | 13.60 (12.20, 15.60) | Z=-0.84 | 0.401 |
| PTT Min, M (Q₁, Q₃) | 29.30 (26.10, 33.90) | 29.20 (26.10, 33.77) | 29.40 (26.10, 34.10) | Z=-0.20 | 0.841 |
| Lactate Min, M (Q₁, Q₃) | 1.40 (1.00, 1.90) | 1.40 (1.00, 1.90) | 1.40 (1.10, 1.90) | Z=-1.27 | 0.205 |
| PH Min, M (Q₁, Q₃) | 7.33 (7.27, 7.39) | 7.34 (7.28, 7.40) | 7.32 (7.25, 7.38) | Z=-5.49 | <.001 |
| Treatment variables |  |  |  |  |  |
| CRRT, n (%) |  |  |  | χ²=19.07 | <.001 |
| No | 2666 (93.48) | 1444 (95.38) | 1222 (91.33) |  |  |
| Yes | 186 (6.52) | 70 (4.62) | 116 (8.67) |  |  |
| Mechanical ventilation, n (%) |  |  |  | χ²=151.76 | <.001 |
| No | 1113 (39.03) | 751 (49.60) | 362 (27.06) |  |  |
| Yes | 1739 (60.97) | 763 (50.40) | 976 (72.94) |  |  |
| Vasopressin, n (%) |  |  |  | χ²=36.14 | <.001 |
| No | 2537 (88.96) | 1397 (92.27) | 1140 (85.20) |  |  |
| Yes | 315 (11.04) | 117 (7.73) | 198 (14.80) |  |  |
| Midazolam Use, n (%) |  |  |  | χ²=326.39 | <.001 |
| No | 2082 (73.00) | 1319 (87.12) | 763 (57.03) |  |  |
| Yes | 770 (27.00) | 195 (12.88) | 575 (42.97) |  |  |
| Fentanyl Use, n (%) |  |  |  | χ²=208.35 | <.001 |
| No | 1431 (50.18) | 952 (62.88) | 479 (35.80) |  |  |
| Yes | 1421 (49.82) | 562 (37.12) | 859 (64.20) |  |  |
| Z: Mann-Whitney test, χ²: Chi-square test | | | | | |
| M: Median, Q₁: 1st Quartile, Q₃: 3st Quartile | | | | | |

**Table S3.** Analysis of differences between groups in the internal validation set.

| Variables | Total (n = 1901) | No-SAD  (n = 1021) | SAD  (n = 880) | Statistic | P |
| --- | --- | --- | --- | --- | --- |
|
| Demographic variables |  |  |  |  |  |
| Age, M (Q₁, Q₃) | 77.00 (71.00, 84.00) | 78.00 (71.00, 84.00) | 77.00 (71.00, 84.00) | Z=-0.35 | 0.728 |
| Gender, n (%) |  |  |  | χ²=0.35 | 0.554 |
| Female | 874 (45.98) | 463 (45.35) | 411 (46.70) |  |  |
| Male | 1027 (54.02) | 558 (54.65) | 469 (53.30) |  |  |
| Weight, M (Q₁, Q₃) | 79.00 (66.00, 92.00) | 78.00 (66.00, 91.00) | 79.00 (67.00, 93.00) | Z=-1.44 | 0.149 |
| Admission Type, n (%) |  |  |  | χ²=0.47 | 0.492 |
| Non-Emergency | 620 (32.61) | 340 (33.30) | 280 (31.82) |  |  |
| Emergency | 1281 (67.39) | 681 (66.70) | 600 (68.18) |  |  |
| Vital signs |  |  |  |  |  |
| Temperature Mean, M (Q₁, Q₃) | 36.80 (36.60, 37.20) | 36.80 (36.50, 37.00) | 37.00 (36.70, 37.40) | Z=-11.20 | <.001 |
| Heart Rate Mean, M (Q₁, Q₃) | 83.00 (74.00, 95.00) | 83.00 (74.00, 94.00) | 83.00 (73.75, 96.00) | Z=-0.49 | 0.627 |
| Respiratory Rate Mean, M (Q₁, Q₃) | 19.00 (17.00, 22.00) | 19.00 (17.00, 22.00) | 19.50 (17.00, 23.00) | Z=-2.27 | 0.023 |
| SBP Mean, M (Q₁, Q₃) | 113.00 (105.00, 125.00) | 114.00 (105.00, 125.00) | 112.50 (105.00, 124.00) | Z=-0.73 | 0.467 |
| DBP Mean, M (Q₁, Q₃) | 58.00 (53.00, 65.00) | 58.00 (53.00, 64.00) | 58.00 (53.00, 65.00) | Z=-0.28 | 0.781 |
| MBP Mean, M (Q₁, Q₃) | 74.00 (69.00, 81.00) | 74.00 (68.00, 81.00) | 74.00 (69.00, 80.00) | Z=-0.42 | 0.676 |
| Po2 Max, M (Q₁, Q₃) | 150.00 (85.00, 324.00) | 149.00 (78.00, 352.00) | 152.00 (93.00, 285.00) | Z=-0.63 | 0.528 |
| Pco2 Max, M (Q₁, Q₃) | 45.00 (39.00, 53.00) | 45.00 (39.00, 51.00) | 46.00 (40.00, 55.00) | Z=-3.82 | <.001 |
| Comorbidity variables |  |  |  |  |  |
| Hypertension, n (%) |  |  |  | χ²=0.01 | 0.926 |
| No | 1296 (68.17) | 697 (68.27) | 599 (68.07) |  |  |
| Yes | 605 (31.83) | 324 (31.73) | 281 (31.93) |  |  |
| Diabetes, n (%) |  |  |  | χ²=0.70 | 0.403 |
| No | 1532 (80.59) | 830 (81.29) | 702 (79.77) |  |  |
| Yes | 369 (19.41) | 191 (18.71) | 178 (20.23) |  |  |
| Cancer, n (%) |  |  |  | χ²=0.02 | 0.896 |
| No | 1506 (79.22) | 810 (79.33) | 696 (79.09) |  |  |
| Yes | 395 (20.78) | 211 (20.67) | 184 (20.91) |  |  |
| Respiratory Failure, n (%) |  |  |  | χ²=18.70 | <.001 |
| No | 1522 (80.06) | 855 (83.74) | 667 (75.80) |  |  |
| Yes | 379 (19.94) | 166 (16.26) | 213 (24.20) |  |  |
| Renal Failure, n (%) |  |  |  | χ²=2.59 | 0.108 |
| No | 1388 (73.01) | 761 (74.53) | 627 (71.25) |  |  |
| Yes | 513 (26.99) | 260 (25.47) | 253 (28.75) |  |  |
| Neurological Disease, n (%) |  |  |  | χ²=30.66 | <.001 |
| No | 1432 (75.33) | 821 (80.41) | 611 (69.43) |  |  |
| Yes | 469 (24.67) | 200 (19.59) | 269 (30.57) |  |  |
| SOFA score, M (Q₁, Q₃) | 6.00 (4.00, 8.00) | 5.00 (3.00, 7.00) | 6.00 (4.00, 9.00) | Z=-6.30 | <.001 |
| Biochemistry variables |  |  |  |  |  |
| Hemoglobin Min, M (Q₁, Q₃) | 9.10 (7.90, 10.80) | 9.50 (8.20, 11.00) | 8.60 (7.50, 10.40) | Z=-7.60 | <.001 |
| Platelets Max, M (Q₁, Q₃) | 202.00 (150.00, 274.00) | 203.00 (150.00, 271.00) | 201.50 (150.75, 275.50) | Z=-0.09 | 0.925 |
| WBC Max, M (Q₁, Q₃) | 13.50 (9.90, 18.60) | 13.20 (9.60, 18.20) | 13.75 (10.20, 19.10) | Z=-2.28 | 0.023 |
| BUN Min, M (Q₁, Q₃) | 22.00 (15.00, 35.00) | 21.00 (15.00, 33.00) | 24.00 (16.00, 37.00) | Z=-2.79 | 0.005 |
| Calcium Min, M (Q₁, Q₃) | 8.10 (7.60, 8.60) | 8.10 (7.70, 8.60) | 8.00 (7.50, 8.50) | Z=-2.57 | 0.010 |
| Creatinine Min, M (Q₁, Q₃) | 1.00 (0.80, 1.60) | 1.00 (0.80, 1.50) | 1.10 (0.80, 1.70) | Z=-1.85 | 0.064 |
| Sodium Max, M (Q₁, Q₃) | 141.00 (138.00, 144.00) | 140.00 (137.00, 142.00) | 142.00 (139.00, 146.00) | Z=-11.63 | <.001 |
| Potassium Min, M (Q₁, Q₃) | 3.90 (3.50, 4.30) | 3.90 (3.60, 4.30) | 3.90 (3.50, 4.30) | Z=-1.46 | 0.145 |
| INR Min, M (Q₁, Q₃) | 1.20 (1.10, 1.40) | 1.20 (1.10, 1.40) | 1.20 (1.10, 1.50) | Z=-3.03 | 0.002 |
| PT Min, M (Q₁, Q₃) | 13.50 (12.40, 15.70) | 13.40 (12.30, 15.30) | 13.70 (12.40, 16.10) | Z=-2.63 | 0.009 |
| PTT Min, M (Q₁, Q₃) | 29.00 (26.00, 34.10) | 29.00 (25.90, 33.80) | 29.00 (26.10, 34.32) | Z=-0.87 | 0.383 |
| Lactate Min, M (Q₁, Q₃) | 1.40 (1.00, 1.90) | 1.40 (1.00, 1.90) | 1.40 (1.10, 1.90) | Z=-0.95 | 0.341 |
| PH Min, M (Q₁, Q₃) | 7.33 (7.27, 7.39) | 7.34 (7.28, 7.39) | 7.32 (7.24, 7.38) | Z=-5.33 | <.001 |
| Treatment variables |  |  |  |  |  |
| CRRT, n (%) |  |  |  | χ²=7.16 | 0.007 |
| No | 1761 (92.64) | 961 (94.12) | 800 (90.91) |  |  |
| Yes | 140 (7.36) | 60 (5.88) | 80 (9.09) |  |  |
| Mechanical ventilation, n (%) |  |  |  | χ²=61.86 | <.001 |
| No | 726 (38.19) | 473 (46.33) | 253 (28.75) |  |  |
| Yes | 1175 (61.81) | 548 (53.67) | 627 (71.25) |  |  |
| Vasopressin, n (%) |  |  |  | χ²=26.98 | <.001 |
| No | 1694 (89.11) | 945 (92.56) | 749 (85.11) |  |  |
| Yes | 207 (10.89) | 76 (7.44) | 131 (14.89) |  |  |
| Midazolam Use, n (%) |  |  |  | χ²=225.02 | <.001 |
| No | 1419 (74.64) | 904 (88.54) | 515 (58.52) |  |  |
| Yes | 482 (25.36) | 117 (11.46) | 365 (41.48) |  |  |
| Fentanyl Use, n (%) |  |  |  | χ²=137.07 | <.001 |
| No | 964 (50.71) | 645 (63.17) | 319 (36.25) |  |  |
| Yes | 937 (49.29) | 376 (36.83) | 561 (63.75) |  |  |
| Z: Mann-Whitney test, χ²: Chi-square test | | | | | |
| M: Median, Q₁: 1st Quartile, Q₃: 3st Quartile | | | | | |

**Table S4.** Analysis of differences between groups in the external validation set.

| Variables | Total (n = 281) | No-SAD  (n = 161) | SAD  (n = 120) | Statistic | P |
| --- | --- | --- | --- | --- | --- |
|
| Demographic variables |  |  |  |  |  |
| Age, M (Q₁, Q₃) | 74.00 (70.00, 80.00) | 72.00 (68.00, 79.00) | 78.00 (72.00, 81.00) | Z=-4.97 | <.001 |
| Gender, n (%) |  |  |  | χ²=3.95 | 0.047 |
| Female | 126 (44.84) | 64 (39.75) | 62 (51.67) |  |  |
| Male | 155 (55.16) | 97 (60.25) | 58 (48.33) |  |  |
| Weight, M (Q₁, Q₃) | 71.00 (62.00, 84.00) | 72.00 (60.00, 82.00) | 71.00 (64.75, 84.25) | Z=-0.33 | 0.744 |
| Admission Type, n (%) |  |  |  | χ²=1.18 | 0.277 |
| Non-Emergency | 84 (29.89) | 44 (27.33) | 40 (33.33) |  |  |
| Emergency | 197 (70.11) | 117 (72.67) | 80 (66.67) |  |  |
| Vital signs |  |  |  |  |  |
| Temperature Mean, M (Q₁, Q₃) | 36.90 (36.60, 37.30) | 36.70 (36.50, 37.00) | 37.15 (36.80, 37.60) | Z=-6.59 | <.001 |
| Heart Rate Mean, M (Q₁, Q₃) | 88.00 (76.00, 104.00) | 86.00 (76.00, 105.00) | 89.50 (75.75, 103.25) | Z=-0.12 | 0.908 |
| Respiratory Rate Mean, M (Q₁, Q₃) | 20.00 (17.00, 23.00) | 20.00 (18.00, 23.00) | 20.00 (16.00, 23.25) | Z=-1.10 | 0.270 |
| SBP Mean, M (Q₁, Q₃) | 112.00 (102.00, 122.00) | 109.00 (101.00, 122.00) | 115.50 (104.00, 123.00) | Z=-2.21 | 0.027 |
| DBP Mean, M (Q₁, Q₃) | 59.00 (52.00, 68.00) | 59.00 (52.00, 67.00) | 59.50 (53.00, 69.00) | Z=-0.90 | 0.371 |
| MBP Mean, M (Q₁, Q₃) | 74.00 (69.00, 81.00) | 74.00 (69.00, 82.00) | 75.00 (68.00, 81.00) | Z=-0.16 | 0.876 |
| PO2 Max, M (Q₁, Q₃) | 128.00 (81.00, 254.00) | 128.00 (85.00, 255.00) | 128.00 (79.75, 239.75) | Z=-0.27 | 0.790 |
| PCO2 Max, M (Q₁, Q₃) | 42.00 (35.00, 50.00) | 42.00 (37.00, 51.00) | 42.00 (32.75, 49.00) | Z=-1.29 | 0.198 |
| Comorbidity variables |  |  |  |  |  |
| Hypertension, n (%) |  |  |  | χ²=1.86 | 0.173 |
| No | 156 (55.52) | 95 (59.01) | 61 (50.83) |  |  |
| Yes | 125 (44.48) | 66 (40.99) | 59 (49.17) |  |  |
| Diabetes, n (%) |  |  |  | χ²=4.82 | 0.028 |
| No | 204 (72.60) | 125 (77.64) | 79 (65.83) |  |  |
| Yes | 77 (27.40) | 36 (22.36) | 41 (34.17) |  |  |
| Cancer, n (%) |  |  |  | χ²=0.50 | 0.478 |
| No | 212 (75.44) | 124 (77.02) | 88 (73.33) |  |  |
| Yes | 69 (24.56) | 37 (22.98) | 32 (26.67) |  |  |
| Respiratory Failure, n (%) |  |  |  | χ²=3.61 | 0.057 |
| No | 206 (73.31) | 125 (77.64) | 81 (67.50) |  |  |
| Yes | 75 (26.69) | 36 (22.36) | 39 (32.50) |  |  |
| Renal Failure, n (%) |  |  |  | χ²=1.86 | 0.173 |
| No | 226 (80.43) | 125 (77.64) | 101 (84.17) |  |  |
| Yes | 55 (19.57) | 36 (22.36) | 19 (15.83) |  |  |
| Neurological Disease, n (%) |  |  |  | χ²=11.40 | <.001 |
| No | 211 (75.09) | 133 (82.61) | 78 (65.00) |  |  |
| Yes | 70 (24.91) | 28 (17.39) | 42 (35.00) |  |  |
| SOFA score, M (Q₁, Q₃) | 6.00 (4.00, 9.00) | 5.00 (3.00, 6.00) | 9.00 (5.00, 10.00) | Z=-6.63 | <.001 |
| Biochemistry variables |  |  |  |  |  |
| Hemoglobin Min, M (Q₁, Q₃) | 9.60 (8.40, 11.00) | 9.80 (8.70, 11.00) | 9.25 (7.80, 10.90) | Z=-2.51 | 0.012 |
| Platelets Max, M (Q₁, Q₃) | 197.00 (134.00, 279.00) | 191.00 (134.00, 277.00) | 201.50 (135.75, 279.00) | Z=-0.19 | 0.852 |
| WBC Max, M (Q₁, Q₃) | 13.00 (8.40, 18.70) | 11.70 (7.90, 17.40) | 14.40 (10.18, 19.27) | Z=-2.15 | 0.032 |
| BUN Min, M (Q₁, Q₃) | 25.00 (23.00, 29.00) | 25.00 (23.00, 28.00) | 26.00 (23.75, 30.25) | Z=-2.45 | 0.014 |
| Calcium Min, M (Q₁, Q₃) | 8.00 (7.20, 8.10) | 8.00 (7.60, 8.10) | 7.90 (7.20, 8.10) | Z=-0.59 | 0.553 |
| Creatinine Min, M (Q₁, Q₃) | 1.10 (0.80, 1.70) | 1.00 (0.70, 1.70) | 1.30 (0.80, 2.02) | Z=-1.93 | 0.053 |
| Sodium Max, M (Q₁, Q₃) | 141.00 (138.00, 144.00) | 140.00 (137.00, 144.00) | 142.00 (139.00, 144.00) | Z=-2.20 | 0.027 |
| Potassium Min, M (Q₁, Q₃) | 3.90 (3.50, 4.30) | 3.90 (3.50, 4.30) | 3.90 (3.50, 4.30) | Z=-0.26 | 0.798 |
| INR Min, M (Q₁, Q₃) | 1.20 (1.10, 1.40) | 1.20 (1.10, 1.40) | 1.20 (1.10, 1.33) | Z=-0.29 | 0.775 |
| PT Min, M (Q₁, Q₃) | 13.50 (12.30, 15.20) | 13.40 (12.20, 15.10) | 13.65 (12.30, 15.43) | Z=-0.52 | 0.602 |
| PTT Min, M (Q₁, Q₃) | 29.40 (26.60, 34.30) | 29.80 (26.70, 35.30) | 28.80 (26.43, 33.97) | Z=-0.98 | 0.329 |
| Lactate Min, M (Q₁, Q₃) | 1.40 (1.00, 2.20) | 1.30 (1.00, 2.00) | 1.60 (1.10, 2.42) | Z=-2.11 | 0.035 |
| PH Min, M (Q₁, Q₃) | 7.35 (7.27, 7.40) | 7.35 (7.28, 7.40) | 7.33 (7.26, 7.40) | Z=-0.74 | 0.456 |
| Treatment variables |  |  |  |  |  |
| CRRT, n (%) |  |  |  | χ²=3.38 | 0.066 |
| No | 248 (88.26) | 147 (91.30) | 101 (84.17) |  |  |
| Yes | 33 (11.74) | 14 (8.70) | 19 (15.83) |  |  |
| Mechanical ventilation, n (%) |  |  |  | χ²=10.67 | 0 .001 |
| No | 189 (67.26) | 121 (75.16) | 68 (56.67) |  |  |
| Yes | 92 (32.74) | 40 (24.84) | 52 (43.33) |  |  |
| Vasopressin, n (%) |  |  |  | χ²=0.18 | 0.667 |
| No | 212 (75.44) | 123 (76.40) | 89 (74.17) |  |  |
| Yes | 69 (24.56) | 38 (23.60) | 31 (25.83) |  |  |
| Midazolam Use, n (%) |  |  |  | χ²=28.29 | <.001 |
| No | 209 (74.38) | 139 (86.34) | 70 (58.33) |  |  |
| Yes | 72 (25.62) | 22 (13.66) | 50 (41.67) |  |  |
| Fentanyl Use, n (%) |  |  |  | χ²=0.00 | 0.971 |
| No | 94 (33.45) | 54 (33.54) | 40 (33.33) |  |  |
| Yes | 187 (66.55) | 107 (66.46) | 80 (66.67) |  |  |
| Z: Mann-Whitney test, χ²: Chi-square test | | | | | |
| M: Median, Q₁: 1st Quartile, Q₃: 3st Quartile | | | | | |

**Table S5:** Multivariate Logistic Regression Analysis of Predictors for Sepsis-Associated Delirium (SAD)

| Variable | Odds Ratio (95% CI) | P-value |
| --- | --- | --- |
| Neurological disease | 1.660 (1.352–2.033) | <0.001 |
| Mechanical ventilation | 1.883 (1.561–2.264) | <0.001 |
| Midazolam use | 3.931 (3.121–4.958) | <0.001 |
| Fentanyl use | 0.833 (0.672–1.015) | 0.064 |
| SOFA score | 1.031 (1.010–1.062) | 0.036 |
| Temperature mean | 2.014 (1.719–2.353) | <0.001 |
| Hemoglobin min | 0.843 (0.807–0.881) | <0.001 |
| Sodium max | 1.098 (1.081–1.116) | <0.001 |

**Table S6：** The results of Hosmer–Lemeshow test.

| Data | X-squared | df | p-value |
| --- | --- | --- | --- |
| Training set | 12.918 | 8 | 0.1147 |
| Internal validation set | 4.3848 | 8 | 0.8208 |
| External validation set | 8.9542 | 8 | 0.3462 |
